# Supplementary material for: iBCS: 2. Mechanistic Modeling of Pulmonary Availability of Inhaled Drugs versus Critical Product Attributes
Source: PubMed Central journal article supplement — Mol Pharm. 2022 May 24;19(7):2040–7. doi: 10.1021/acs.molpharmaceut.2c00112 (PMC9257747; doi:10.1021/acs.molpharmaceut.2c00112), 2022-05-24
Supplement: mp2c00112_si_001.pdf [file mp2c00112_si_001.pdf]

## Supplemental Information

### A: Lung deposition patterns

Lung deposition patterns were calculated using Mimetikos Preludium inbuilt deposition functions parameterized as in Table A1. Parameters were selected to represent a healthy subject inhaling at flow and particle size distribution ranges covering a typical product types on market (nebulizers, pressurized metered dose inhalers (pMDI's) and dry powder inhalers (DPI's)).

**Table A1:** Parametrization of Deposition model

| Parameter                        | Value              | Comment/Source |
|----------------------------------|--------------------|----------------|
| Lung Model                       | Weibel             | [3]            |
| Large conducting airways (BB)    | Generation 0-8     | [3]            |
| Small conducting airways (bb)    | Generation 9-16    | [3]            |
| Respiratory region (AI)          | Generation 17-23   | [3]            |
| Functional Residual Capacity     | 3300 L             | [4]            |
| Deposition model (mouth-throat)  | DeHaan             | [1]            |
| Deposition model (Lung)          | NCRP               | [2]            |
| Bolus Volume                     | 450 mL             |                |
| Tidal Volume                     | 1500 mL            |                |
| Breath Hold                      | 10s                |                |
| Inspiratory Flow                 | 15-90 L/min        |                |
| Expiratory Flow                  | = Inspiratory Flow |                |
| Mass Median Aerodynamic Diameter | 1-6 $\mu\text{m}$  |                |
| Geometric Standard Deviation     | 2                  |                |
| Coarse fraction                  | 0%                 |                |

Figure A1 depicts the simulated lung deposition patterns expressed as the ratio of conducting airway dose  $B_b$  (BB+bb) over total lung dose (LD) (Figure A1A), and as the ratio of large conducting airway dose (BB) over small conducting airway dose (bb) (Figure 1B).

A

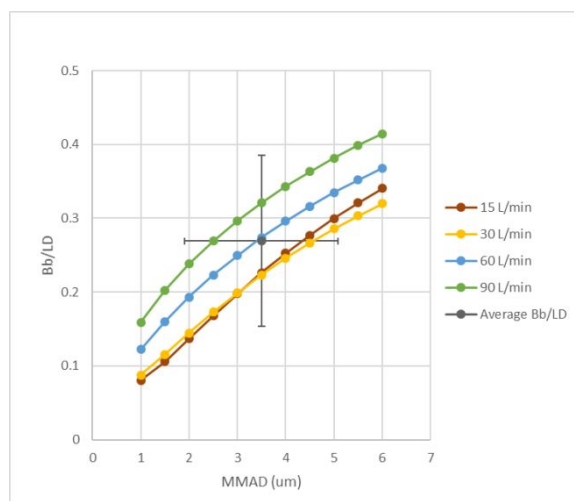

B

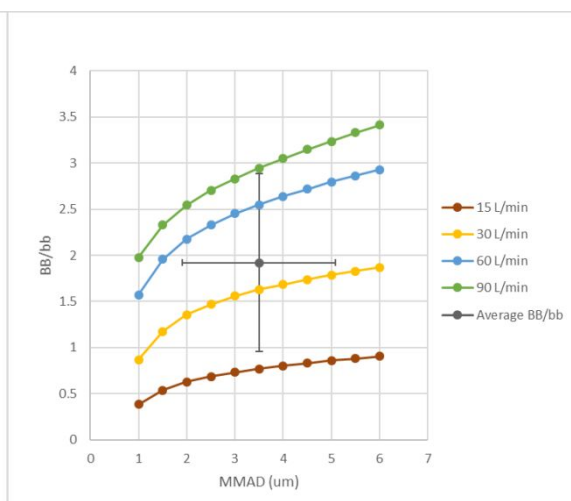

**Figure A1:** Simulated lung deposition expressed as conducting airway deposition over total lung deposition  $B_b/LD$  (A), and large conducting airway deposition over small airway deposition  $BB/bb$  (B) as a function of the mass median aerodynamic diameter (MMAD) at inhalation flows ranging from 15 L/min to 90 L/min). The black marker represents the global arithmetic mean  $\pm$  SD.

As expected, there is an increase in both total airway deposition (Figure A1A) and large airway deposition (Figure A1B) fractions as impaction of aerosol increases with increased inhalation flow and MMAD. The average airway deposition is about 27% of the total lung deposition (Figure A1A) and it is roughly divided 2:1 between large and small airways (Figure A1B). However, given the attributes of real products on market, all combinations of MMAD and inhalation flow cannot be regarded as likely. For example, large MMAD's around 5-6  $\mu\text{m}$  are normally associated with nebulizer products inhaled at tidal flows < 20 L/min), whereas low resistance dry powder inhalers inhaled at 90 L/min normally have MMAD's around 2-3  $\mu\text{m}$ . For the purpose of understanding the sensitivity of the modelling outcomes to variations  $M_{Bb}/M_{Al}$  ratio, model outcomes were generated for all  $C_s$ , lung dose and  $P_{\text{eff}}$  combinations in Table 2 as the average of three different deposition ratios (4:6, 3:7 and 2:8), representing a range of deposition outcomes that includes the majority of the flow and MMAD combinations depicted in Figure A1A.

### References

1. DeHaan, W.H.; Finlay, W.H. Predicting extrathoracic deposition from dry powder inhalers, *Aerosol Sci.* **2004**, *35*, 309-331.
2. NCRP Report 125: *Deposition, Retention and Dosimetry of Inhaled Radioactive Substances*, ISBN 0-929600-54-1: **1997**.
3. Weibel, E.R. *Morphometry of the human lung*. Springer, Berlin: **1963**.
4. Yu, C.P., Diu, C.K. A comparative study of aerosol deposition in different lung models. *Am Ind Hyg Assoc J.* **1982**, 43:54.

## Supplemental Information

### B: Dose, solubility and effective pulmonary permeability for some marketed drug products

Table B1 summarizes data on nominal doses, water solubility and effective permeability ( $P_{\text{eff}}$ ) for some commercial inhaled medicines. The products selected are dry powder inhalers (DPI's), pressurized metered dose inhalers (pMDI's) or soft mist inhalers and as such the actual lung deposited doses are likely to be significantly lower than the nominal doses (<50%). Hence dose numbers for the lung ( $Do_{\text{Lung}}$ ) were calculated based on the assumption that the lung dose would be 50% of the nominal. This is likely to still result in an overestimation of the dose number. Data on aqueous solubility (PBS, pH7.4) and  $P_{\text{eff}}$  were sourced from literature. Aqueous solubility may be an underestimate of actual ELF solubility (given its high lipid content). Hence, the  $Do$ -numbers in table B1 may be overestimated. As can be seen from Table B1, calculated  $Do_{\text{Lung}}$  range from  $1E-5$  to  $2.5E2$  whereas  $P_{\text{eff}}$  values range from  $0.5E-5$  to  $2E-8$   $\text{cm}^2/\text{s}$ .

**Table B1:** Nominal Dose, Solubility, Dose numbers and Permeability for Some Marketed Drug Products

| Drug                   | Product <sup>1</sup>  | Nominal Dose <sup>1</sup><br>( $\mu\text{g}$ ) | Aqueous solubility <sup>2</sup><br>( $\mu\text{g}/\text{mL}$ ) | $Do^3$    | $P_{\text{eff}}^4$<br>( $E-6$ $\text{cm}^2/\text{s}$ ) |
|------------------------|-----------------------|------------------------------------------------|----------------------------------------------------------------|-----------|--------------------------------------------------------|
| Budesonide             | Pulmicort Flexhaler   | 90                                             | 26.3 <sup>5</sup>                                              | 0.17      | 5.2 <sup>6</sup>                                       |
| Fluticasone Propionate | Flovent Diskus        | 250                                            | 0.09 <sup>5</sup>                                              | 139       | 3.8 <sup>6</sup>                                       |
| Fluticasone Furoate    | Arnuity Ellipta       | 100                                            | 0.02 <sup>5</sup>                                              | 250       | 3.5 <sup>6</sup>                                       |
| Mometasone Furoate     | Asmanex HFA           | 100                                            | 0.26 <sup>16</sup>                                             | 19.2      | 3.8 <sup>7</sup>                                       |
| Terbutaline            | Bricanyl Turbuhaler   | 500                                            | 666000 <sup>8</sup>                                            | 0.000038  | 1.4 <sup>6</sup>                                       |
| Vilanterol Trifenetate | Anoro Ellipta         | 25                                             | 33 <sup>9</sup>                                                | 0.04      | 1.1 <sup>10</sup>                                      |
| Salbutamol Sulfate     | Albuterol Sulfate HFA | 90                                             | 17700 <sup>13</sup>                                            | 0.00025   | 0.82 <sup>6</sup>                                      |
| Salmeterol Xinafoate   | Serevent Diskus       | 50                                             | 107 <sup>14</sup>                                              | 0.0234    | 0.86 <sup>6</sup>                                      |
| Tiotropium Bromide     | Spiriva Handihaler    | 18                                             | 25000 <sup>15</sup>                                            | 0.000036  | 0.55 <sup>6</sup>                                      |
| Ipratropium Bromide    | Atrovent HFA          | 17                                             | 90000 <sup>12</sup>                                            | 0.0000094 | 0.28 <sup>11</sup>                                     |

1. Product information obtained from Drugbank <https://go.drugbank.com/drugs/>;
2. Solubility in phosphate buffered saline, pH 7.4
3.  $Do$  calculated as per Equation 4 in (main article) assuming lung lining fluid volume to be 10 mL [8] and lung dose to be 50% of nominal dose
4. Effective permeability across lung epithelium
5. Solubility in PBS pH 7.4 (Figure 2 in [7])
6. Effective permeability across lung epithelium as derived from isolated perfused rat lung [5]
7. Crim et al 2001, [2]
8. Encyclopedia of Toxicology (3<sup>rd</sup> Ed)[4]
9. Solubility in water as obtained from PubChem <https://pubchem.ncbi.nlm.nih.gov/bioassay/483572#sid=103757352&section=Test-Results>
10. Calculated from passive in vitro permeability (EMEA Assessment report Trelegy Ellipta), using Eriksson (2017) correlation to  $P_{\text{eff}}$
11. Calculated from in vitro permeability [10], using Eriksson [5] correlation to  $P_{\text{eff}}$
12. Taylor et al 2006, [11]
13. Marques et al. 1990., [9]
14. Johanna Eriksson, personal communication
15. FDA pharmacology review Spiriva Respimat [6]
16. Solubility in PBS pH 7.4 [8]

## References

1. Berg, M.M.; Kim, K-J.; Lubman, R.L.; Crandall, E.D. Hydrophilic solute transport across rat alveolar epithelium. *J Appl Physiol*. **1989**, *66* (5), 2320-2327.
2. Crim, C.; Pierre, L.N.; Daley-Yates, P.T. A review of the pharmacology and pharmacokinetics of inhaled fluticasone propionate and mometasone furoate. *Clin Ther*. **2001** *23*(9), 1339-54.
3. EMEA Assessment report Trelegy Ellipta (2017), p40.  
[https://www.ema.europa.eu/en/documents/assessment-report/trelegy-ellipta-epar-public-assessment-report\\_en.pdf](https://www.ema.europa.eu/en/documents/assessment-report/trelegy-ellipta-epar-public-assessment-report_en.pdf)
4. Encyclopedia of Toxicology, 3rd Edition - March 11, 2014, Editor-in-Chief: Philip Wexler, Academic Press Inc. (2014). ISBN: 9780123864543
5. Eriksson J, Sjögren E, Thörn H, Rubin, K, Bäckman P, Lennernäs H: Pulmonary absorption - estimation of effective pulmonary permeability and tissue retention of ten drugs using an ex-vivo rat model and computational analysis. *Eur J Pharmaceut Biopharmaceut* 2017, doi:  
<https://doi.org/10.1016/j.ejpb.2017.11.013>
6. FDA pharmacology review Spiriva Respimat (2015)  
<https://www.fda.gov/downloads/Drugs/DevelopmentApprovalProcess/DevelopmentResources/UCM473565.pdf>
7. Forbes, B.; Bäckman, P.; Christopher, D.; Dolovich, M.; Li, B.V.; Morgan, B.; In Vitro Testing for Orally Inhaled Products: Developments in Science-Based Regulatory Approaches. *The AAPS Journal*, **2015**, *17*, (4), () 837-852. <https://doi.org/10.1208/s12248-015-9763-3>
8. Hastedt, J.E.; Bäckman, P.; Clark, A.R.; Doub, W.; Hickey, A.; Hochhaus, G.; Kuehl, P.J.; Lehr, C.-M.; Mauser, P.; McConville, J. ; Niven, R.; Sakagami, M.; Weers, J.G. Scope and relevance of a pulmonary biopharmaceutical classification system AAPS/FDA/USP Workshop March 16-17th, 2015 in Baltimore, MD, *AAPS Open*, **2016**, *2*, (1)
9. Marques, H.M.C.; Hadgraft, J.; Kellaway, I.W. Studies of cyclodextrin inclusion complexes. I. The salbutamol–cyclodextrin complex as studied by phase solubility and DSC. *International Journal of Pharmaceutics*, **1990**, *63*, 259–66,. [https://doi.org/10.1016/0378-5173\(90\)90132-N](https://doi.org/10.1016/0378-5173(90)90132-N)
10. Panduga, V.; Stocks, M.J.; Bosquillon, C. Ipratropium is 'luminally recycled' by an inter-play between apical uptake and efflux transporters in Calu-3 bronchial epithelial cell layers. *International Journal of Pharmaceutics*, **2017**, *532*, (1), 328-336.<http://dx.doi.org/10.1016/j.ijpharm.2017.08.112>
11. Taylor, M.K.; Hickey, A.J.; VanOort, M. Manufacture, Characterization, and Pharmacodynamic Evaluation of Engineered Ipratropium Bromide Particles *Pharmaceutical Development and Technology*. **2006** *11*, 321–36, <http://doi.org/10.1080/10837450600769637>
